# Supplementary material for: Associations between Plasma Lipid Mediators and Chronic Daily Headache Outcomes in Patients Randomized to a Low Linoleic Acid Diet with or without Added Omega-3 Fatty Acids
Source: MDPI journal article supplement (doi:10.3390/metabo13060690), 2023-05-25
Supplement: s1 [file s1]

## Supplementary information

**Supplementary Table S1.** List of oxylipins (total or free) analyzed in our prior and current dietary intervention. Oxylipins highlighted in yellow were not measured previously. They were measured in the present study. Asterisk (\*) indicates that the oxylipin was measured but not detected.

| Oxylipins                                                     | Ramsden et al, 2013<br>[21] | Ramsden et al, 2017<br>[38] | Domenichiello et al, 2020<br>[23] | Ramsden et al, 2021<br>[24] | Current<br>study  |
|---------------------------------------------------------------|-----------------------------|-----------------------------|-----------------------------------|-----------------------------|-------------------|
| <b>Docosahexaenoic acid (DHA, 22:6 n-3)-derived oxylipins</b> |                             |                             |                                   |                             |                   |
| 13(14)-EpDPE                                                  | /                           | /                           | /                                 | /                           | free (plasma)     |
| 16(17)-EpDPE                                                  | /                           | /                           | free (plasma)                     | /                           | free (plasma)     |
| 19(20)-EpDPE                                                  | /                           | /                           | free (plasma)                     | /                           | free (plasma)     |
| 10(11)-EpDPE                                                  | /                           | /                           | /                                 | /                           | free<br>(plasma)* |
| 7(8)-EpDPE                                                    | /                           | /                           | /                                 | /                           | free<br>(plasma)* |
| 7,8-DiHDPE                                                    | /                           | /                           | /                                 | /                           | free<br>(plasma)* |
| 10,11-DiHDPE                                                  | /                           | /                           | /                                 | /                           | free (plasma)     |
| 13,14-DiHDPE                                                  | /                           | /                           | /                                 | /                           | free (plasma)     |
| 16,17-DiHDPE                                                  | /                           | /                           | /                                 | /                           | free (plasma)     |
| 19,20-DiHDPE                                                  | /                           | /                           | /                                 | /                           | free (plasma)     |
| 4-HDHA                                                        | /                           | /                           | free (plasma)                     | total (plasma),<br>(serum)  | free /            |
| 7-HDHA                                                        | /                           | /                           | free (plasma)                     | /                           | /                 |

|                                                               |               |   |               |                                   |
|---------------------------------------------------------------|---------------|---|---------------|-----------------------------------|
| 10-HDHA                                                       | /             | / | /             | total (plasma), free /<br>(serum) |
| 14-HDHA                                                       | /             | / | free (plasma) | total (plasma), free /<br>(serum) |
| 17-HDHA                                                       | free (plasma) | / | free (plasma) | total (plasma), free /<br>(serum) |
| RvD1                                                          | /             | / | free (plasma) | / /                               |
| RvD2                                                          | free (plasma) | / | /             | / /                               |
| <b>Eicosapentanoic acid (EPA, 20:5 n-3)-derived oxylipins</b> |               |   |               |                                   |
| 18-HEPE                                                       | free (plasma) | / | free (plasma) | / /                               |
| 12-HEPE                                                       | /             | / | /             | free<br>(plasma)*                 |
| 8(9)-EpETE                                                    | /             | / | /             | free<br>(plasma)*                 |
| 11(12)-EpETE                                                  | /             | / | /             | free<br>(plasma)*                 |
| 14(15)-EpETE                                                  | /             | / | /             | free<br>(plasma)*                 |
| 17(18)-EpETE                                                  | /             | / | /             | free<br>(plasma)*                 |
| 8,9-DiHETE                                                    | /             | / | /             | free<br>(plasma)*                 |

|                                                                             |                |   |               |                         |                    |
|-----------------------------------------------------------------------------|----------------|---|---------------|-------------------------|--------------------|
| 11,12-DiHETE                                                                | /              | / | /             | /                       | free (plasma)*     |
| 14,15-DiHETE                                                                | /              | / | /             | /                       | free (plasma)*     |
| 17,18-DiHETE                                                                | /              | / | /             | /                       | free (plasma)*     |
| Resolvin E1                                                                 | /              | / | /             | /                       | free (plasma)*     |
| <b><math>\alpha</math>-linolenic acid (ALA, 18:3 n-3)-derived oxylipins</b> |                |   |               |                         |                    |
| 9-HOTrE                                                                     | /              | / | free (plasma) | /                       | free (plasma)      |
| 13- HOTrE                                                                   | /              | / | free (plasma) | /                       | /                  |
| 9(10)-EpODE                                                                 | /              | / | /             | /                       | free (plasma)      |
| 12(13)-EpODE                                                                | /              | / | /             | /                       | free (plasma)      |
| 15(16)-EpODE                                                                | /              | / | /             | /                       | free (plasma)      |
| 9,10-DiHODE                                                                 | /              | / | /             | /                       | free (plasma)      |
| 12,13-DiHODE                                                                | /              | / | /             | /                       | free (plasma)*     |
| 15,16-DiHODE                                                                | /              | / | /             | /                       | free (plasma)      |
| <b>Arachidonic acid (AA, 20:4 n-6)-derived oxylipins</b>                    |                |   |               |                         |                    |
| 5-HETE                                                                      | total (plasma) | / | free (plasma) | total (plasma), (serum) | free free (plasma) |
| 8-HETE                                                                      | total (plasma) | / | free (plasma) | total (plasma), (serum) | free free (plasma) |

|               |                |   |               |                            |                    |
|---------------|----------------|---|---------------|----------------------------|--------------------|
| 9-HETE        | total (plasma) | / | /             | /                          | free (plasma)*     |
| 11-HETE       | total (plasma) | / | free (plasma) | /                          | free (plasma)      |
| 12-HETE       | total (plasma) | / | free (plasma) | total (plasma),<br>(serum) | free free (plasma) |
| 15-HETE       | total (plasma) | / | free (plasma) | total (plasma),<br>(serum) | free free (plasma) |
| 19-HETE       | /              | / | /             | /                          | free (plasma)*     |
| 20-HETE       | /              | / | free (plasma) | /                          | free (plasma)*     |
| 5,6-DiHETrE   | /              | / | /             | /                          | free (plasma)*     |
| 8,9-DiHETrE   | /              | / | /             | /                          | free (plasma)      |
| 11,12-DiHETrE | /              | / | /             | /                          | free (plasma)      |
| 14,15-DiHETrE | /              | / | /             | /                          | free (plasma)*     |
| 5(6)-EpETrE   | /              | / | /             | /                          | free (plasma)*     |
| 8(9)-EpETrE   | /              | / | free (plasma) | /                          | free (plasma)      |
| 11(12)-EpETrE | /              | / | /             | /                          | free (plasma)      |
| 14(15)-EpETrE | /              | / | free (plasma) | /                          | free (plasma)      |

|                      |   |   |               |              |                   |
|----------------------|---|---|---------------|--------------|-------------------|
| 5-oxo-EET            | / | / | free (plasma) | /            | free<br>(plasma)* |
| 15-oxo-EET           | / | / | /             | /            | free<br>(plasma)* |
| PGF2 $\alpha$        | / | / | /             | /            | free (plasma)     |
| PGE2                 | / | / | /             | free (serum) | free<br>(plasma)* |
| PGD2                 | / | / | /             | /            | free<br>(plasma)* |
| PGB2                 | / | / | /             | /            | free<br>(plasma)* |
| PGJ2                 | / | / | /             | /            | free<br>(plasma)* |
| 15-deoxy-PGJ2        | / | / | /             | /            | free<br>(plasma)* |
| TXB2                 | / | / | /             | free (serum) | free<br>(plasma)* |
| LTB4                 | / | / | /             | free (serum) | free<br>(plasma)* |
| LXA4                 | / | / | /             | /            | free<br>(plasma)* |
| 6-keto-PGF1 $\alpha$ | / | / | /             | /            | free<br>(plasma)* |

|                                                                        |                |               |               |                            |                           |
|------------------------------------------------------------------------|----------------|---------------|---------------|----------------------------|---------------------------|
| Cysteinyl LTs                                                          | /              | /             | /             | free (serum)               | /                         |
| <b>Di-homo-gamma-linolenic acid (DGLA, 20:3 n-6)-derived oxylipins</b> |                |               |               |                            |                           |
| <b>15(S)-HETrE</b>                                                     | /              | /             | /             | /                          | <b>free (plasma)</b>      |
| <b>Linoleic acid (LA, 18:2 n-6)-derived oxylipins</b>                  |                |               |               |                            |                           |
| 9-HODE                                                                 | total (plasma) | /             | free (plasma) | total (plasma),<br>(serum) | free free (plasma)        |
| 13-HODE                                                                | total (plasma) | /             | free (plasma) | total (plasma),<br>(serum) | free free (plasma)        |
| 9-oxo-ODE                                                              | total (plasma) | /             | /             | /                          | free (plasma)             |
| 13-oxo-ODE                                                             | total (plasma) | /             | /             | /                          | free<br>(plasma)*         |
| 9(10)-EpOME                                                            | /              | /             | free (plasma) | /                          | free (plasma)             |
| 12(13)-EpOME                                                           | /              | /             | free (plasma) | total (plasma),<br>(serum) | free free (plasma)        |
| 9,10-DiHOME                                                            | /              | /             | free (plasma) | /                          | free (plasma)             |
| 12,13-DiHOME                                                           | /              | /             | free (plasma) | total (plasma),<br>(serum) | free free (plasma)        |
| <b>9,10,13-TriHOME</b>                                                 | /              | /             | /             | total (plasma),<br>(serum) | free <b>free (plasma)</b> |
| <b>9,12,13-TriHOME</b>                                                 | /              | /             | /             | total (plasma),<br>(serum) | free <b>free (plasma)</b> |
| 9H-12,13E-LA                                                           | /              | free (plasma) | /             | total (plasma)             | /                         |
| 9K-12,13E-LA                                                           | /              | free (plasma) | /             | /                          | /                         |

|               |   |               |   |                              |   |
|---------------|---|---------------|---|------------------------------|---|
| 11H-12,13E-LA | / | free (plasma) | / | total (plasma)               | / |
| 11H-9,10E-LA  | / | free (plasma) | / | total (plasma), free (serum) | / |
| 13H-9,10E-LA  | / | free (plasma) | / | total (plasma), free (serum) | / |

**Supplementary Table S2.** Parent ion, product ion, and retention time (RT) of 34 oxylipins detected by UPLC-MS/MS in this cohort. Optimization parameters derived from Hennebelle et al.[35]

| Oxylipins                                                                   | Abbreviation | Parent ion<br>m/z | Product ion<br>m/z | RT    |
|-----------------------------------------------------------------------------|--------------|-------------------|--------------------|-------|
| <b>Docosahexaenoic acid (DHA, 22:6 n-3)-derived oxylipins</b>               |              |                   |                    |       |
| 13(14)-epoxydocosapentaenoic acid                                           | 13(14)-EpDPE | 343.2             | 193.2              | 15.49 |
| 16(17)-epoxydocosapentaenoic acid                                           | 16(17)-EpDPE | 343.2             | 233.2              | 15.37 |
| 19(20)-epoxydocosapentaenoic acid                                           | 19(20)-EpDPE | 343.2             | 241.2              | 14.84 |
| 10,11-dihydroxydocosapentaenoic acid                                        | 10,11-DiHDPE | 361.2             | 153.2              | 10.5  |
| 13,14-dihydroxydocosapentaenoic acid                                        | 13,14-DiHDPE | 361.2             | 193.2              | 10.23 |
| 16,17-dihydroxydocosapentaenoic acid                                        | 16,17-DiHDPE | 361.2             | 233.2              | 9.66  |
| 19,20-dihydroxydocosapentaenoic acid                                        | 19,20-DiHDPE | 361.2             | 273.2              | 9.48  |
| <b><math>\alpha</math>-linolenic acid (ALA, 18:3 n-3)-derived oxylipins</b> |              |                   |                    |       |
| 9- hydroxyoctadecatrienoic acid                                             | 9-HOTrE      | 293.2             | 171.2              | 10.19 |
| 9(10)-epoxyoctadecadienoic acid                                             | 9(10)-EpODE  | 293.3             | 171.2              | 12.98 |
| 12(13)-epoxyoctadecadienoic acid                                            | 12(13)-EpODE | 293.2             | 183.1              | 13.32 |
| 15(16)-epoxyoctadecadienoic acid                                            | 15(16)-EpODE | 293.3             | 235.2              | 12.65 |

|                                                                        |               |       |       |       |
|------------------------------------------------------------------------|---------------|-------|-------|-------|
| 9,10-dihydroxyoctadecadienoic acid                                     | 9,10-DiHODE   | 311.2 | 201.2 | 7.29  |
| 15,16-dihydroxyoctadecadienoic acid                                    | 15,16-DiHODE  | 311.2 | 223.2 | 7.22  |
| <b>Arachidonic acid (AA, 20:4 n-6)-derived oxylipins</b>               |               |       |       |       |
| 5-hydroxyeicosatetraenoic acid                                         | 5-HETE        | 319.2 | 115.2 | 14.44 |
| 8-hydroxyeicosatetraenoic acid                                         | 8-HETE        | 319.2 | 155.2 | 13.57 |
| 11-hydroxyeicosatetraenoic acid                                        | 11-HETE       | 319.2 | 167.2 | 13.2  |
| 12-hydroxyeicosatetraenoic acid                                        | 12-HETE       | 319.2 | 179.2 | 13.57 |
| 15-hydroxyeicosatetraenoic acid                                        | 15-HETE       | 319.2 | 219.2 | 12.46 |
| 8,9-dihydroxyeicosatrienoic acid                                       | 8,9-DiHETrE   | 337.2 | 127.1 | 10.65 |
| 11,12-dihydroxyeicosatrienoic acid                                     | 11,12-DiHETrE | 337.2 | 167.1 | 10.15 |
| 8(9)-epoxyeicosatrienoic acid                                          | 8(9)-EpETrE   | 319.2 | 155.2 | 15.98 |
| 11(12)-epoxyeicosatrienoic acid                                        | 11(12)-EpETrE | 319.3 | 167.2 | 15.76 |
| 14(15)-epoxyeicosatrienoic acid                                        | 14(15)-EpETrE | 319.2 | 219.3 | 15.1  |
| Prostaglandin F2- $\alpha$                                             | PGF2 $\alpha$ | 353.2 | 309.2 | 4.54  |
| <b>Di-homo-gamma-linolenic acid (DGLA, 20:3 n-6)-derived oxylipins</b> |               |       |       |       |
| 15(S)-hydroxyeicosatrienoic acid                                       | 15(S)-HETrE   | 321.2 | 221.2 | 14.17 |
| <b>Linoleic acid (LA, 18:2 n-6)-derived oxylipins</b>                  |               |       |       |       |
| 9-hydroxyoctadecadienoic acid                                          | 9-HODE        | 295.2 | 171.1 | 12.3  |
| 13-hydroxyoctadecadienoic acid                                         | 13-HODE       | 295.2 | 195.2 | 12.22 |
| 9-oxo-octadecadienoic acid                                             | 9-oxo-ODE     | 293.2 | 185.1 | 13.38 |
| 9(10)-epoxyoctadecamonoenoic acid                                      | 9(10)-EpOME   | 295.3 | 171.1 | 15.16 |
| 12(13)-epoxyoctadecamonoenoic acid                                     | 12(13)-EpOME  | 295.3 | 195.2 | 14.9  |
| 9,10-dihydroxyoctadecamonoenoic acid                                   | 9,10-DiHOME   | 313.2 | 201.2 | 8.82  |
| 12,13-dihydroxyoctadecamonoenoic acid                                  | 12,13-DiHOME  | 313.2 | 183.2 | 8.45  |



|                                          |                 |       |       |      |
|------------------------------------------|-----------------|-------|-------|------|
| 9,10,13-trihydroxyoctadecamonoenoic acid | 9,10,13-TriHOME | 329.2 | 171.1 | 4.57 |
| 9,12,13-trihydroxyoctadecamonoenoic acid | 9,12,13-TriHOME | 329.2 | 211.1 | 4.49 |

---

## References:

- [21] C.E. Ramsden, K.R. Fautot, D. Zamora, C.M. Suchindran, B.A. Macintosh, S. Gaylord, A. Ringel, J.R. Hibbeln, A.E. Feldstein, T.A. Mori, A. Barden, C. Lynch, R. Coble, E. Mas, O. Palsson, D.A. Barrow, J.D. Mann, Targeted alteration of dietary n-3 and n-6 fatty acids for the treatment of chronic headaches: a randomized trial, *Pain*, 154 (2013) 2441-2451.
- [38] C.E. Ramsden, A.F. Domenichiello, Z.X. Yuan, M.R. Sapio, G.S. Keyes, S.K. Mishra, J.R. Gross, S. Majchrzak-Hong, D. Zamora, M.S. Horowitz, J.M. Davis, A.V. Sorokin, A. Dey, D.M. LaPaglia, J.J. Wheeler, M.R. Vasko, N.N. Mehta, A.J. Mannes, M.J. Iadarola, A systems approach for discovering linoleic acid derivatives that potentially mediate pain and itch, *Science signaling*, 10 (2017).
- [23] A.F. Domenichiello, J.R. Jensen, D. Zamora, M. Horowitz, Z.-X. Yuan, K. Fautot, J.D. Mann, A.J. Mannes, C.E. Ramsden, Identifying oxidized lipid mediators as prognostic biomarkers of chronic posttraumatic headache, *Pain*, 161 (2020) 2775-2785.
- [24] C.E. Ramsden, D. Zamora, K.R. Fautot, B. MacIntosh, M. Horowitz, G.S. Keyes, Z.-X. Yuan, V. Miller, C. Lynch, G. Honvoh, J. Park, R. Levy, A.F. Domenichiello, A. Johnston, S. Majchrzak-Hong, J.R. Hibbeln, D.A. Barrow, J. Loewke, J.M. Davis, A. Mannes, O.S. Palsson, C.M. Suchindran, S.A. Gaylord, J.D. Mann, Dietary alteration of n-3 and n-6 fatty acids for headache reduction in adults with migraine: randomized controlled trial, *BMJ*, 374 (2021) n1448.
- [35] M. Hennebelle, Y. Otoki, J. Yang, B.D. Hammock, A.J. Levitt, A.Y. Taha, W. Swardfager, Altered soluble epoxide hydrolase-derived oxylipins in patients with seasonal major depression: An exploratory study, *Psychiatry Res*, 252 (2017) 94-101.
